# Supplementary material for: Effectiveness of iron polymaltose complex in treatment and prevention of iron deficiency anemia in children: a systematic review and meta-analysis
Source: PubMed Central journal article supplement (PMC7811280; doi:10.7717/peerj.10527), 2021-01-13

A

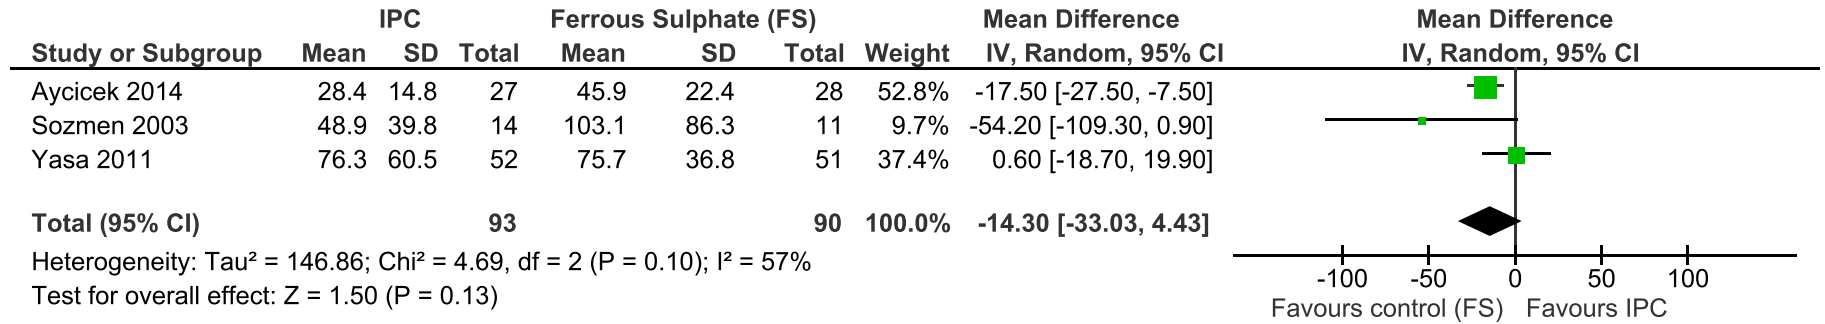

B

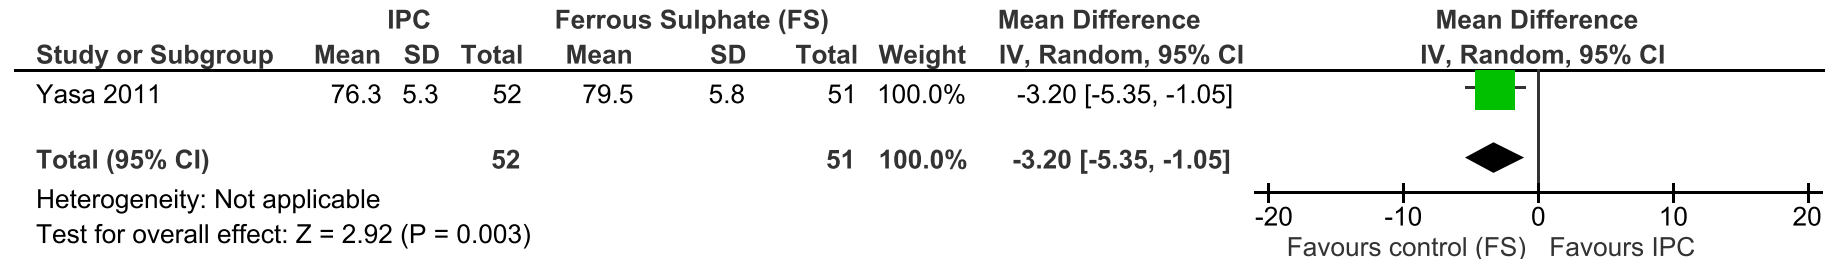

C

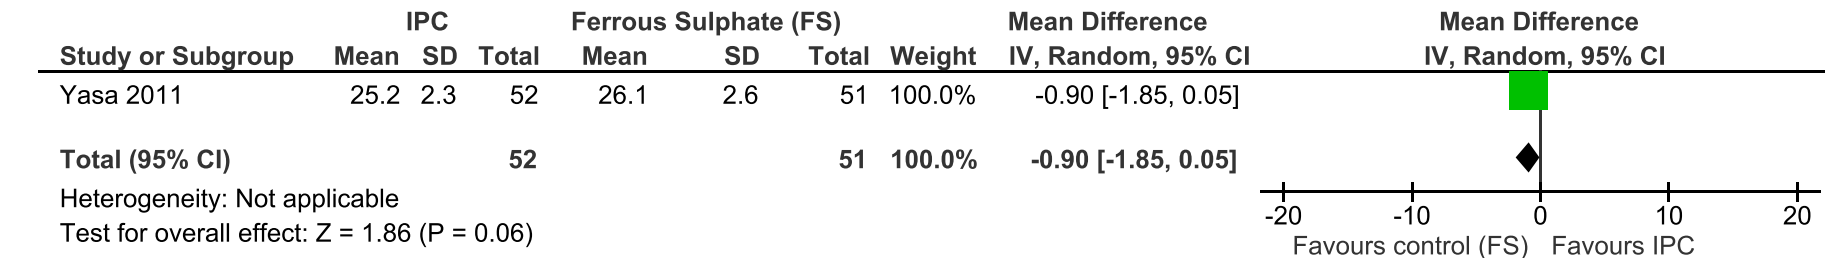

D

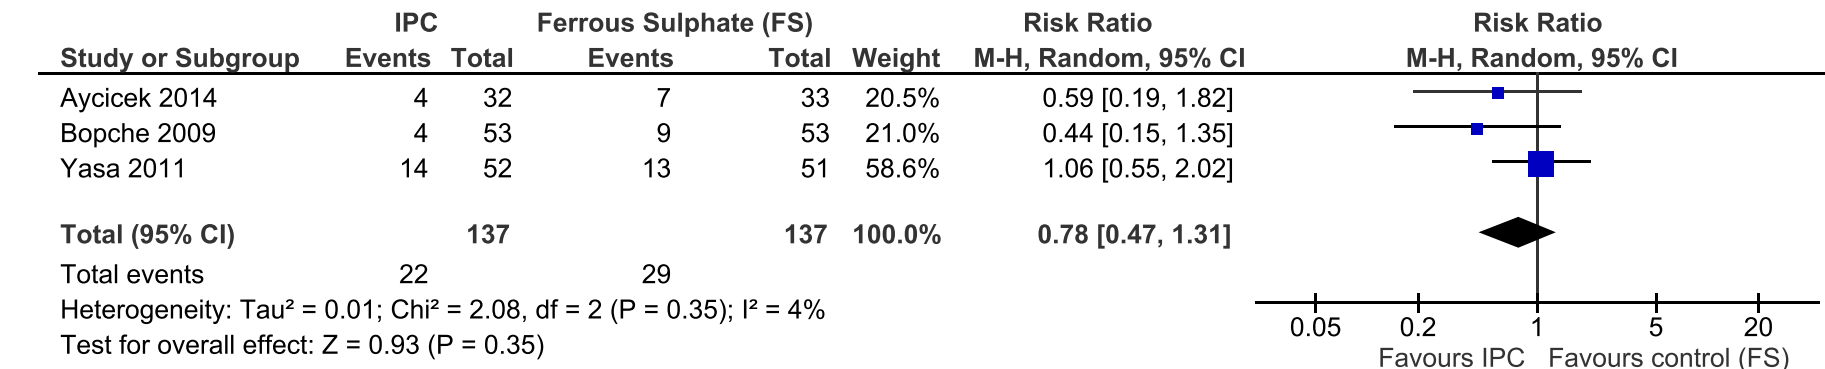

Supplement: peerj-09-10527-s002.pdf [file peerj-09-10527-s002.pdf]
