# Supplementary material for: Effectiveness of iron polymaltose complex in treatment and prevention of iron deficiency anemia in children: a systematic review and meta-analysis
Source: PubMed Central journal article supplement (PMC7811280; doi:10.7717/peerj.10527), 2021-01-13
Supplement: peerj-09-10527-s007.pdf [file peerj-09-10527-s007.pdf]

# Study Eligibility & Data Collection Form

## General Information

|                                                                        |                              |
|------------------------------------------------------------------------|------------------------------|
| <b>Study ID</b><br><i>(e.g. author name, year)</i>                     | Sozmen, 2003                 |
| <b>Form completed by</b>                                               | Ritzzaleena Rosli Mohd Rosli |
| <b>Study author contact details</b>                                    | ritzz.rosli@student.usm.my   |
| <b>Publication type</b><br><i>(e.g. full report, abstract, letter)</i> | Full report                  |
| <b>List of included publications</b>                                   | -                            |
| <b>References of similar trial*</b>                                    | -                            |

\*This is when the authors published the same study in several reports. All these references to a similar trial should be linked under one *Study ID* in RevMan.

## Study eligibility

|                               | Yes | No | Unclear | Further details |
|-------------------------------|-----|----|---------|-----------------|
| <b>RCT/Quasi/CCT</b>          | /   |    |         | RCT             |
| <b>Relevant participants</b>  | /   |    |         |                 |
| <b>Relevant interventions</b> | /   |    |         |                 |
| <b>Relevant outcomes*</b>     | /   |    |         |                 |

\*Include only if the presence of outcomes form the inclusion criterion

If the above answers are 'YES', proceed to Section 1.

If any of the above answers are 'NO\*', record below the information for 'Excluded studies'

| Reason(s) for exclusion |
|-------------------------|
| -                       |

## Section 1. Characteristics of included studies

This section is to be completed by only one reviewer. State initials: RRMR

| METHODS                                                                   | Descriptions as stated in paper                                                                                                                                                     |
|---------------------------------------------------------------------------|-------------------------------------------------------------------------------------------------------------------------------------------------------------------------------------|
| <b>Aim of study</b> (e.g. efficacy, equivalence, pragmatic)               | The aim of this study was to investigate the effects of ferrous sulphate and ferric hydroxide–polymaltose complex supplementation on the trace element status in children with IDA. |
| <b>Design</b> (e.g. parallel, crossover, cluster)                         | Parallel, randomised group study of Iron Polymaltose versus Ferrous sulphate                                                                                                        |
| <b>Unit of allocation</b> (by individuals, cluster/ groups or body parts) | individuals                                                                                                                                                                         |
| <b>Start &amp; end dates</b>                                              | Not mentioned                                                                                                                                                                       |
| <b>Total study duration</b>                                               | Total study duration not stated. Treatment duration was 6 months                                                                                                                    |
| <b>Sources of funding</b> (including role of funders)                     | -                                                                                                                                                                                   |
| <b>Possible conflicts of interest</b> (for study authors)                 | -                                                                                                                                                                                   |

| PARTICIPANTS                                                                                | Description<br>(include information for each intervention or comparison group)                                                                                                                                                            |
|---------------------------------------------------------------------------------------------|-------------------------------------------------------------------------------------------------------------------------------------------------------------------------------------------------------------------------------------------|
| <b>Population description</b> (Company/companies; occupation)                               | Children with iron deficiency anaemia                                                                                                                                                                                                     |
| <b>Setting</b> (including location (city, state, country) and single centre / multicenter)  | Turkey                                                                                                                                                                                                                                    |
| <b>Inclusion criteria</b>                                                                   | <ol style="list-style-type: none"> <li>1. Aged 8-168 months</li> <li>2. Diagnosed with IDA by a haematologist according to their clinical and laboratory data: "Hb&lt;11.5 g/dL, Htc &lt;35%, MCV&lt;75, ferritin&lt;20 mg/dL"</li> </ol> |
| <b>Exclusion criteria</b>                                                                   | -                                                                                                                                                                                                                                         |
| <b>Method of recruitment of participants</b> (e.g. phone, mail, clinic patients, voluntary) | -                                                                                                                                                                                                                                         |
| <b>Total no. randomised</b>                                                                 | 37                                                                                                                                                                                                                                        |
| <b>Clusters</b> (if applicable, no., type, no. people per cluster)                          | -                                                                                                                                                                                                                                         |

|                                                                                                                    |                                                    |
|--------------------------------------------------------------------------------------------------------------------|----------------------------------------------------|
| <b>No. randomised per group</b><br><i>(specify whether no. people or clusters)</i>                                 | Intervention: 17<br>Control: 20                    |
| <b>No. missing</b><br><i>(if overall, e.g. exclusions &amp; withdrawals, whether or not missing from analysis)</i> | Intervention: 3<br>Control: 9                      |
| <b>Reasons missing</b>                                                                                             | Not mentioned                                      |
| <b>Baseline imbalances</b>                                                                                         | No baseline imbalances of the laboratory's values. |
| <b>Age</b>                                                                                                         | 8- 168 months                                      |
| <b>Sex (proportion)</b>                                                                                            | Male 22 female 15                                  |
| <b>Race/Ethnicity</b>                                                                                              | -                                                  |
| <b>Other relevant sociodemographics</b>                                                                            | -                                                  |
| <b>Subgroups measured</b><br><i>(eg split by age or sex)</i>                                                       | -                                                  |
| <b>Subgroups reported</b>                                                                                          | -                                                  |

## Section 2. Risk of bias assessment

We recommend you refer to and use the method described in the Cochrane Handbook.

This section is completed by two reviewers. State initials: (i) RRMR (ii) NMN

| Domain                                                              | Risk of bias | Support for judgement<br>(include direct quotes where available with explanatory comments)                                                                                                                                                                                                                                                                                                                                                                                                                                        | Location in text or source<br>(page, table) |
|---------------------------------------------------------------------|--------------|-----------------------------------------------------------------------------------------------------------------------------------------------------------------------------------------------------------------------------------------------------------------------------------------------------------------------------------------------------------------------------------------------------------------------------------------------------------------------------------------------------------------------------------|---------------------------------------------|
| <b>Random sequence generation</b><br>(selection bias)               | unclear      | "Seventeen, who were chosen randomly,"                                                                                                                                                                                                                                                                                                                                                                                                                                                                                            | Page 3                                      |
| <b>Allocation concealment</b><br>(selection bias)                   | unclear      | Not mentioned in full text                                                                                                                                                                                                                                                                                                                                                                                                                                                                                                        | -                                           |
| <b>Blinding of participants and personnel</b><br>(performance bias) | unclear      | Not mentioned in full text                                                                                                                                                                                                                                                                                                                                                                                                                                                                                                        | -                                           |
| <b>Blinding of outcome assessment</b><br>(detection bias)           | low          | "Hemoglobin and hematocrit levels were determined by an automatic hemocounter (Abbott Cell-Dyne 3700 hemocounter), and serum iron and iron-binding capacity were measured by an autoanalyzer using a commercially available kit."                                                                                                                                                                                                                                                                                                 | Page 3                                      |
| <b>Incomplete outcome data</b><br>(attrition bias)                  | unclear      | Reason for missing not mentioned in full text.<br>However, total final number of participants in both groups is balanced.<br><br>"Thirty-seven children (aged 8–168 mo, 22 boys and 15 girls) with IDA were taken into the study"<br><br>"Seventeen, who were chosen randomly, were treated with the ferric hydroxide-polymaltose complex (Ferrum, Vifor, Switzerland) (6 mg/kg/d in the first 3 mo for initial therapy and then 3 mg/kg for 3 mo as maintenance); the others (n=20) were treated with a ferrous sulfate complex" | Page 2<br><br>Page 3                        |
| <b>Selective outcome reporting</b><br>(reporting bias)              | Low          | Study protocol not available.<br><br>All pre-specified and expected outcomes of interest are reported                                                                                                                                                                                                                                                                                                                                                                                                                             | -                                           |
| <b>Other bias</b>                                                   | Low          | No other bias identified                                                                                                                                                                                                                                                                                                                                                                                                                                                                                                          | -                                           |

Random sequence generation = Process used to assign people into intervention and control groups  
Allocation concealment = Process used to prevent foreknowledge of group assignment in a RCT  
Blinding of participants and personnel = Presence or absence of blinding for participants and health personnel  
Blinding of outcome assessment = presence or absence of blinding for assessment of outcome  
Incomplete outcome data = application of intention-to-treat analysis is one in which all the participants in a trial are analysed according to the intervention to which they were allocated  
Selective outcome reporting = Selection of a subset of the original variables recorded

### Section 3. Intervention groups

This section is completed by two reviewers. State initials: (i) RRMR (ii) NMN

| <b>Outcomes relevant to your review</b><br><i>(Copy and paste from 'Types of outcome measures')</i> | <b>Reported in paper</b><br><i>(Yes / No)</i> | <b>Outcome definition</b><br><i>(with diagnostic criteria if relevant)</i> | <b>Unit of measurement &amp; tool</b><br><i>(if relevant)</i>    | <b>Reanalysis required?</b><br><i>(specify)</i> |
|-----------------------------------------------------------------------------------------------------|-----------------------------------------------|----------------------------------------------------------------------------|------------------------------------------------------------------|-------------------------------------------------|
| 1. Haemoglobin (Hb)                                                                                 | Yes                                           | level at end of treatment                                                  | (g/dL) automatic hemocounter (Abbott-Cell-Dyne 3700 hemocounter) | No                                              |
| 2. Serum Ferritin                                                                                   | Yes                                           | level at end of treatment                                                  | Not written in table                                             | No                                              |
| 3. Serum iron                                                                                       | Yes                                           | level at end of treatment                                                  | Not written in table                                             | No                                              |
| 4. Serum mean corpuscular volume (MCV)                                                              | No                                            | -                                                                          | -                                                                | No                                              |
| 5. Serum mean corpuscular haemoglobin (MCH)                                                         | No                                            | -                                                                          | -                                                                | No                                              |
| 6. Gastrointestinal disturbances as side effects                                                    | No                                            | -                                                                          | -                                                                | No                                              |

## Section 4. Data and analysis

| DICHOTOMOUS<br>OUTCOME | Intervention group  |                           | Control group       |                           |
|------------------------|---------------------|---------------------------|---------------------|---------------------------|
|                        | Number of<br>events | Number of<br>participants | Number of<br>events | Number of<br>participants |
| -                      | -                   | -                         | -                   | -                         |

State details if outcomes were only described in text or figures.

| CONTINUOUS<br>OUTCOME | Unit of<br>measurement | Intervention group |             | Control group |              |
|-----------------------|------------------------|--------------------|-------------|---------------|--------------|
|                       |                        | n                  | Mean (SD)   | n             | Mean (SD)    |
| 1. Haemoglobin (Hb)   | (g/dL)                 | 14                 | 11.6 (0.7)  | 11            | 12.5(1.2)    |
| 2. Serum Ferritin     | ng/mL                  | 14                 | 11.8 (7.8)  | 11            | 56.6 (43.1)  |
| 3. Serum iron         | ng/dL                  | 14                 | 48.9 (39.8) | 11            | 103.1 (86.3) |

State details if outcomes were only described in text or figures.

## Section 5. Other information

|                                                                                                                                                                                                                                        | Description as stated in paper                                                                                                                                                                                                                                                                                                                   |
|----------------------------------------------------------------------------------------------------------------------------------------------------------------------------------------------------------------------------------------|--------------------------------------------------------------------------------------------------------------------------------------------------------------------------------------------------------------------------------------------------------------------------------------------------------------------------------------------------|
| <b>Key conclusions of study authors</b>                                                                                                                                                                                                | <i>“In conclusion, our data showed that copper and ceruloplasmin metabolisms were affected by ferrous iron supplementation, possibly by a competition, whereas ferric iron maintained normal levels of zinc. We conclude that copper and zinc status of patients with IDA should be taken into consideration before and after iron therapy.”</i> |
| <b>Results that you calculated using a formula</b>                                                                                                                                                                                     | -                                                                                                                                                                                                                                                                                                                                                |
| <b>References to other relevant studies</b><br><i>(Did this report include any references to unpublished data from potentially eligible trials not already identified for this review? If yes, give list contact name and details)</i> | -                                                                                                                                                                                                                                                                                                                                                |
| <b>Correspondence required for further study information</b> <i>(from whom, what and when)</i>                                                                                                                                         | -                                                                                                                                                                                                                                                                                                                                                |

### Sources:

Higgins JPT, Green S (editors). Cochrane Handbook for Systematic Reviews of Interventions Version 5.1.0 [updated March 2011]. The Cochrane Collaboration, 2011. Available from [www.cochrane-handbook.org](http://www.cochrane-handbook.org).
