# Supplementary material for: Effectiveness of iron polymaltose complex in treatment and prevention of iron deficiency anemia in children: a systematic review and meta-analysis
Source: PubMed Central journal article supplement (PMC7811280; doi:10.7717/peerj.10527), 2021-01-13
Supplement: peerj-09-10527-s009.pdf [file peerj-09-10527-s009.pdf]

# Study Eligibility & Data Collection Form

## General Information

|                                                                 |                              |
|-----------------------------------------------------------------|------------------------------|
| <b>Study ID</b><br>(e.g. author name, year)                     | Bopche, 2009                 |
| <b>Form completed by</b>                                        | Ritzzaleena Rosli Mohd Rosli |
| <b>Study author contact details</b>                             | ritzz.rosli@student.usm.my   |
| <b>Publication type</b><br>(e.g. full report, abstract, letter) | Full report                  |
| <b>List of included publications</b>                            | -                            |
| <b>References of similar trial*</b>                             | -                            |

\*This is when the authors published the same study in several reports. All these references to a similar trial should be linked under one *Study ID* in RevMan.

## Study eligibility

|                               | Yes | No | Unclear | Further details |
|-------------------------------|-----|----|---------|-----------------|
| <b>RCT/Quasi/CCT</b>          | /   |    |         | RCT             |
| <b>Relevant participants</b>  | /   |    |         |                 |
| <b>Relevant interventions</b> | /   |    |         |                 |
| <b>Relevant outcomes*</b>     | /   |    |         |                 |

\*Include only if the presence of outcomes form the inclusion criterion

If the above answers are 'YES', proceed to Section 1.

If any of the above answers are 'NO\*', record below the information for 'Excluded studies'

| Reason(s) for exclusion |
|-------------------------|
| -                       |

## Section 1. Characteristics of included studies

This section is to be completed by only one reviewer. State initials: RRMR

| <b>METHODS</b>                                                            | <b>Descriptions as stated in paper</b>                                                                                                  |
|---------------------------------------------------------------------------|-----------------------------------------------------------------------------------------------------------------------------------------|
| <b>Aim of study</b> (e.g. efficacy, equivalence, pragmatic)               | To determine the therapeutic efficacy of two different oral iron preparations: iron polymaltose complex (IPC) and ferrous sulfate (FS). |
| <b>Design</b> (e.g. parallel, crossover, cluster)                         | Parallel study comparing Iron Polymaltose and Ferrous Sulphate                                                                          |
| <b>Unit of allocation</b> (by individuals, cluster/ groups or body parts) | individuals                                                                                                                             |
| <b>Start &amp; end dates</b>                                              | October 2004 – September 2005                                                                                                           |
| <b>Total study duration</b>                                               | 1 year                                                                                                                                  |
| <b>Sources of funding</b> (including role of funders)                     | None                                                                                                                                    |
| <b>Possible conflicts of interest</b> (for study authors)                 | Not stated                                                                                                                              |

| <b>PARTICIPANTS</b>                                                                         | <b>Description</b><br>(include information for each intervention or comparison group)                                       |
|---------------------------------------------------------------------------------------------|-----------------------------------------------------------------------------------------------------------------------------|
| <b>Population description</b> (Company/companies; occupation)                               | Children with Iron deficiency anaemia                                                                                       |
| <b>Setting</b> (including location (city, state, country) and single centre / multicenter)  | Teaching institution with a tertiary level paediatric centre in central India.                                              |
| <b>Inclusion criteria</b>                                                                   | <ol style="list-style-type: none"> <li>Age ranging from 1-6 years</li> <li>IDA confirmed by serum iron chemistry</li> </ol> |
| <b>Exclusion criteria</b>                                                                   | Not mentioned                                                                                                               |
| <b>Method of recruitment of participants</b> (e.g. phone, mail, clinic patients, voluntary) | Patients attending outpatient department                                                                                    |
| <b>Total no. randomised</b>                                                                 | 118                                                                                                                         |
| <b>Clusters</b> (if applicable, no., type, no. people per cluster)                          | No                                                                                                                          |

|                                                                                                                    |                                 |
|--------------------------------------------------------------------------------------------------------------------|---------------------------------|
| <b>No. randomised per group</b><br><i>(specify whether no. people or clusters)</i>                                 | Intervention: 59<br>Control: 59 |
| <b>No. missing</b><br><i>(if overall, e.g. exclusions &amp; withdrawals, whether or not missing from analysis)</i> | Intervention: 6<br>Control:6    |
| <b>Reasons missing</b>                                                                                             | Lost to follow up               |
| <b>Baseline imbalances</b>                                                                                         | No                              |
| <b>Age</b>                                                                                                         | 1-6 years old                   |
| <b>Sex (proportion)</b>                                                                                            | Not mentioned                   |
| <b>Race/Ethnicity</b>                                                                                              | Indian                          |
| <b>Other relevant sociodemographic</b>                                                                             | -                               |
| <b>Subgroups measured</b><br><i>(e.g. split by age or sex)</i>                                                     | -                               |
| <b>Subgroups reported</b>                                                                                          | -                               |

## Section 2. Risk of bias assessment

We recommend you refer to and use the method described in the Cochrane Handbook.

This section is completed by two reviewers. State initials: (i) RRMR (ii) NMN

| Domain                                                              | Risk of bias |      |         | Support for judgement<br>(include direct quotes where available with explanatory comments)              | Location in text or source<br>(page, table) |
|---------------------------------------------------------------------|--------------|------|---------|---------------------------------------------------------------------------------------------------------|---------------------------------------------|
|                                                                     | Low          | High | Unclear |                                                                                                         |                                             |
| <b>Random sequence generation</b><br>(selection bias)               | Low          |      |         | "Randomization was achieved by simple randomization"                                                    | Page 2                                      |
| <b>Allocation concealment</b><br>(selection bias)                   | Low          |      |         | "and allocation was concealed by sealed envelope technique."                                            | Page 2                                      |
| <b>Blinding of participants and personnel</b><br>(performance bias) | Unclear      |      |         | Not mentioned in full text                                                                              | -                                           |
| <b>Blinding of outcome assessment</b> (detection bias)              | Low          |      |         | Outcome is base on laboratory results from blood sample.<br><br>Comment: Objective / continuous outcome | Page 2                                      |
| <b>Incomplete outcome data</b><br>(attrition bias)                  | Low          |      |         | Number of missing participants are equal in each group and both for similar reason.                     | Figure 1: study flow chart, page 2          |
| <b>Selective outcome reporting</b><br>(reporting bias)              | Low          |      |         | Study protocol not available<br><br>All pre-specified and expected outcomes of interest are reported    | -                                           |
| <b>Other bias</b>                                                   | Low          |      |         | No other bias identified                                                                                | -                                           |

Random sequence generation = Process used to assign people into intervention and control groups

Allocation concealment = Process used to prevent foreknowledge of group assignment in a RCT

Blinding of participants and personnel = Presence or absence of blinding for participants and health personnel

Blinding of outcome assessment = presence or absence of blinding for assessment of outcome

Incomplete outcome data = application of intention-to-treat analysis is one in which all the participants in a trial are analysed according to the intervention to which they were allocated

Selective outcome reporting = Selection of a subset of the original variables recorded

### Section 3. Intervention groups

This section is completed by two reviewers. State initials: (i) RRMR (ii) NMN

| Outcomes relevant to your review<br><i>(Copy and paste from 'Types of outcome measures')</i> | Reported in paper<br><i>(Yes / No)</i> | Outcome definition<br><i>(with diagnostic criteria if relevant)</i> | Unit of measurement & tool<br><i>(if relevant)</i> | Reanalysis required?<br><i>(specify)</i> |
|----------------------------------------------------------------------------------------------|----------------------------------------|---------------------------------------------------------------------|----------------------------------------------------|------------------------------------------|
| 1. Haemoglobin (Hb)                                                                          | Yes                                    | level at end of treatment                                           | (g/dL)                                             | No                                       |
| 2. Serum Ferritin                                                                            | No                                     | -                                                                   | -                                                  | No                                       |
| 3. Serum iron                                                                                | No                                     | -                                                                   | -                                                  | No                                       |
| 4. Serum mean corpuscular volume (MCV)                                                       | No                                     | -                                                                   | -                                                  | No                                       |
| 5. Serum mean corpuscular haemoglobin (MCH)                                                  | No                                     | -                                                                   | -                                                  | No                                       |
| 6. Gastrointestinal disturbances as side effects                                             | Yes                                    | Described as gastrointestinal side effects.                         | -                                                  | No                                       |

### Section 4. Data and analysis

| DICHOTOMOUS OUTCOME                           | Intervention group |                        | Control group    |                        |
|-----------------------------------------------|--------------------|------------------------|------------------|------------------------|
|                                               | Number of events   | Number of participants | Number of events | Number of participants |
| Gastrointestinal disturbances as side effects | 4                  | 53                     | 9                | 53                     |

State details if outcomes were only described in text or figures.

| CONTINUOUS OUTCOME              | Unit of measurement | Intervention group |                | Control group |                |
|---------------------------------|---------------------|--------------------|----------------|---------------|----------------|
|                                 |                     | n                  | Mean (SD)      | n             | Mean (SD)      |
| Mean change of haemoglobin (Hb) | (g/dL)              | 53                 | 8.565 (0.3809) | 53            | 8.985 (1.6507) |
| Haemoglobin (Hb)                | (g/dL)              | 53                 | 8.67 (0.73)    | 53            | 9.44 (0.67)    |

State details if outcomes were only described in text or figures.

## Section 5. Other information

|                                                                                                                                                                                                                                        | Description as stated in paper                                                                                                          |
|----------------------------------------------------------------------------------------------------------------------------------------------------------------------------------------------------------------------------------------|-----------------------------------------------------------------------------------------------------------------------------------------|
| <b>Key conclusions of study authors</b>                                                                                                                                                                                                | Ferrous sulfate has a better clinical response as compared to Iron polymaltose complex for treating iron deficiency anemia in children. |
| <b>Results that you calculated using a formula</b>                                                                                                                                                                                     | -                                                                                                                                       |
| <b>References to other relevant studies</b><br><i>(Did this report include any references to unpublished data from potentially eligible trials not already identified for this review? If yes, give list contact name and details)</i> | -                                                                                                                                       |
| <b>Correspondence required for further study information</b> <i>(from whom, what and when)</i>                                                                                                                                         | -                                                                                                                                       |

### Sources:

Higgins JPT, Green S (editors). Cochrane Handbook for Systematic Reviews of Interventions Version 5.1.0 [updated March 2011]. The Cochrane Collaboration, 2011. Available from [www.cochrane-handbook.org](http://www.cochrane-handbook.org).
