# Supplementary material for: Effectiveness of iron polymaltose complex in treatment and prevention of iron deficiency anemia in children: a systematic review and meta-analysis
Source: PubMed Central journal article supplement (PMC7811280; doi:10.7717/peerj.10527), 2021-01-13
Supplement: peerj-09-10527-s012.pdf [file peerj-09-10527-s012.pdf]

# Study Eligibility & Data Collection Form

## General Information

|                                                                        |                              |
|------------------------------------------------------------------------|------------------------------|
| <b>Study ID</b><br><i>(e.g. author name, year)</i>                     | Aycicek, 2014                |
| <b>Form completed by</b>                                               | Ritzzaleena Rosli Mohd Rosli |
| <b>Study author contact details</b>                                    | ritzz.rosli@student.usm.my   |
| <b>Publication type</b><br><i>(e.g. full report, abstract, letter)</i> | Full report                  |
| <b>List of included publications</b>                                   | -                            |
| <b>References of similar trial*</b>                                    | -                            |

\*This is when the authors published the same study in several reports. All these references to a similar trial should be linked under one *Study ID* in RevMan.

## Study eligibility

|                               | Yes | No | Unclear | Further details |
|-------------------------------|-----|----|---------|-----------------|
| <b>RCT/Quasi/CCT</b>          | /   |    |         | RCT             |
| <b>Relevant participants</b>  | /   |    |         |                 |
| <b>Relevant interventions</b> | /   |    |         |                 |
| <b>Relevant outcomes*</b>     | /   |    |         |                 |

\*Include only if the presence of outcomes form the inclusion criterion

If the above answers are 'YES', proceed to Section 1.

If any of the above answers are 'NO\*', record below the information for 'Excluded studies'

| Reason(s) for exclusion |
|-------------------------|
| -                       |

## Section 1. Characteristics of included studies

This section is to be completed by only one reviewer. State initials: RRMR

| <b>METHODS</b>                                                            | <b>Descriptions as stated in paper</b>                                                                                                                               |
|---------------------------------------------------------------------------|----------------------------------------------------------------------------------------------------------------------------------------------------------------------|
| <b>Aim of study</b> (e.g. efficacy, equivalence, pragmatic)               | The purpose of this study was to compare the total oxidant and antioxidant effect of different oral iron preparations in children with iron-deficiency anemia (IDA). |
| <b>Design</b> (e.g. parallel, crossover, cluster)                         | Parallel study comparing Iron Polymaltose, Ferrous Sulphate and healthy children without any treatment.<br>Open label randomized controlled trial.                   |
| <b>Unit of allocation</b> (by individuals, cluster/ groups or body parts) | individuals                                                                                                                                                          |
| <b>Start &amp; end dates</b>                                              | January 2011 until May 2012                                                                                                                                          |
| <b>Total study duration</b>                                               | 17 months                                                                                                                                                            |
| <b>Sources of funding</b> (including role of funders)                     | -                                                                                                                                                                    |
| <b>Possible conflicts of interest</b> (for study authors)                 | -                                                                                                                                                                    |

| <b>PARTICIPANTS</b>                                                                         | <b>Description</b><br>(include information for each intervention or comparison group)                                                                                                                                                                                                                  |
|---------------------------------------------------------------------------------------------|--------------------------------------------------------------------------------------------------------------------------------------------------------------------------------------------------------------------------------------------------------------------------------------------------------|
| <b>Population description</b> (Company/companies; occupation)                               | Pediatrics patients                                                                                                                                                                                                                                                                                    |
| <b>Setting</b> (including location (city, state, country) and single center / multicenter)  | Pediatrics and Pediatric Hematology Outpatient Clinic in Harran University, Turkey.                                                                                                                                                                                                                    |
| <b>Inclusion criteria</b>                                                                   | <ol style="list-style-type: none"> <li>1. IDA was defined as hemoglobin (Hb) below 10.6 g/dL for children at or below the age of 2 years and below 11 g/dL for children older than 2 years and with a serum ferritin value below 12 ng/mL.</li> <li>2. Aged between 1 and 16 years.</li> </ol>         |
| <b>Exclusion criteria</b>                                                                   | <ol style="list-style-type: none"> <li>1. if they had used iron preparations in the previous 3 months</li> <li>2. Had acute infection</li> <li>3. Had a history of chronic disease or parasites</li> <li>4. Suffered blood loss for any reason</li> <li>5. Had occult blood in their stools</li> </ol> |
| <b>Method of recruitment of participants</b> (e.g. phone, mail, clinic patients, voluntary) | All patients were seen at the Outpatient Service of Pediatric Hematology Department                                                                                                                                                                                                                    |

|                                                                                                                    |                                                                                                                       |
|--------------------------------------------------------------------------------------------------------------------|-----------------------------------------------------------------------------------------------------------------------|
| <b>Total no. randomized</b>                                                                                        | 72                                                                                                                    |
| <b>Clusters</b><br><i>(if applicable, no., type, no. people per cluster)</i>                                       | -                                                                                                                     |
| <b>No. randomized per group</b><br><i>(specify whether no. people or clusters)</i>                                 | Intervention (IPC): 33<br>Comparison (Ferrous sulphate): 32<br>Control (healthy, no treatment): 28                    |
| <b>No. missing</b><br><i>(if overall, e.g. exclusions &amp; withdrawals, whether or not missing from analysis)</i> | 7 from overall (loss to follow up)<br>10 excluded after assessment of proper drug used (Intervention:5. Comparison:5) |
| <b>Reasons missing</b>                                                                                             | Loss to follow up, improper use of drugs                                                                              |
| <b>Baseline imbalances</b>                                                                                         | No                                                                                                                    |
| <b>Age</b>                                                                                                         | 1-16 years old                                                                                                        |
| <b>Sex (proportion)</b>                                                                                            | -                                                                                                                     |
| <b>Race/Ethnicity</b>                                                                                              | -                                                                                                                     |
| <b>Other relevant sociodemographic</b>                                                                             | -                                                                                                                     |
| <b>Subgroups measured</b><br><i>(e.g. split by age or sex)</i>                                                     | -                                                                                                                     |
| <b>Subgroups reported</b>                                                                                          | -                                                                                                                     |

## Section 2. Risk of bias assessment

We recommend you refer to and use the method described in the Cochrane Handbook.

This section is completed by two reviewers. State initials: (i) RRMR (ii) NMN

| Domain                                                              | Risk of bias |         |         | Support for judgement<br>(include direct quotes where available with explanatory comments)                                  | Location in text or source<br>(page, table) |
|---------------------------------------------------------------------|--------------|---------|---------|-----------------------------------------------------------------------------------------------------------------------------|---------------------------------------------|
|                                                                     | Low          | High    | Unclear |                                                                                                                             |                                             |
| <b>Random sequence generation</b><br>(selection bias)               |              | low     |         | "simple randomization with no restrictions or matching"                                                                     | Page 1                                      |
| <b>Allocation concealment</b><br>(selection bias)                   |              | unclear |         | Not mentioned in full text                                                                                                  | -                                           |
| <b>Blinding of participants and personnel</b><br>(performance bias) |              | unclear |         | Not mentioned in full text                                                                                                  | -                                           |
| <b>Blinding of outcome assessment</b><br>(detection bias)           |              | low     |         | "All analyses were performed at a single laboratory"<br><br>Comments: results are unlikely to be affected without blinding. | Page 2                                      |
| <b>Incomplete outcome data</b><br>(attrition bias)                  |              | low     |         | Number of missing participants are equal in each group and both for similar reason.                                         | Page 2                                      |
| <b>Selective outcome reporting</b><br>(reporting bias)              |              | low     |         | Study protocol not available.<br><br>All pre-specified and expected outcomes of interest are reported                       |                                             |
| <b>Other bias</b>                                                   |              | low     |         | No other bias identified                                                                                                    |                                             |

Random sequence generation = Process used to assign people into intervention and control groups

Allocation concealment = Process used to prevent foreknowledge of group assignment in a RCT

Blinding of participants and personnel = Presence or absence of blinding for participants and health personnel

Blinding of outcome assessment = presence or absence of blinding for assessment of outcome

Incomplete outcome data = application of intention-to-treat analysis is one in which all the participants in a trial are analyzed according to the intervention to which they were allocated

Selective outcome reporting = Selection of a subset of the original variables recorded

### Section 3. Intervention groups

This section is completed by two reviewers. State initials: (i) RRMR (ii) NMN

| <b>Outcomes relevant to your review</b><br><i>(Copy and paste from 'Types of outcome measures')</i> | <b>Reported in paper</b><br><i>(Yes / No)</i> | <b>Outcome definition</b><br><i>(with diagnostic criteria if relevant)</i> | <b>Unit of measurement &amp; tool</b><br><i>(if relevant)</i> | <b>Reanalysis required?</b><br><i>(specify)</i> |
|-----------------------------------------------------------------------------------------------------|-----------------------------------------------|----------------------------------------------------------------------------|---------------------------------------------------------------|-------------------------------------------------|
| 1. Hemoglobin (Hb)                                                                                  | Yes                                           | Mean level at end of treatment                                             | (g/dL)<br>automated analyser<br>(Celdyn 3700; Abbott, IL).    | No                                              |
| 2. Serum Ferritin                                                                                   | Yes                                           | Mean level at end of treatment                                             | ng/mL<br>commercial kits<br>(Abbott)                          | No                                              |
| 3. Serum iron                                                                                       | Yes                                           | Mean level at end of treatment                                             | mcg/dL<br>commercial kits<br>(Abbott)                         | No                                              |
| 4. Serum mean corpuscular volume (MCV)                                                              | No                                            | -                                                                          | -                                                             | No                                              |
| 5. Serum mean corpuscular hemoglobin (MCH)                                                          | No                                            | -                                                                          | -                                                             | No                                              |
| 6. Gastrointestinal disturbances as side effects                                                    | Yes                                           | Nausea, abdominal pain.                                                    | -                                                             | No                                              |

## Section 4. Data and analysis

| DICHOTOMOUS OUTCOME                              | Intervention group |                        | Control group    |                        |
|--------------------------------------------------|--------------------|------------------------|------------------|------------------------|
|                                                  | Number of events   | Number of participants | Number of events | Number of participants |
| 1. Gastrointestinal disturbances as side effects | 4                  | 32                     | 7                | 33                     |

State details if outcomes were only described in text or figures.

| CONTINUOUS OUTCOME | Unit of measurement | Intervention group |             | Control group |             |
|--------------------|---------------------|--------------------|-------------|---------------|-------------|
|                    |                     | n                  | Mean (SD)   | n             | Mean (SD)   |
| 1. Hemoglobin (Hb) | (g/dL)              | 27                 | 9.6 (1.8)   | 28            | 11.4 (1.4)  |
| 2. Serum Ferritin  | ng/mL               | 27                 | 18.7 (20.1) | 28            | 29.4 (22.4) |
| 3. Serum iron      | mcg/dL              | 27                 | 28.4 (14.8) | 28            | 45.9 (22.4) |

State details if outcomes were only described in text or figures.

## Section 5. Other information

|                                                                                                                                                                                                                                        | Description as stated in paper                                                                                                                                                    |
|----------------------------------------------------------------------------------------------------------------------------------------------------------------------------------------------------------------------------------------|-----------------------------------------------------------------------------------------------------------------------------------------------------------------------------------|
| <b>Key conclusions of study authors</b>                                                                                                                                                                                                | <i>“Serum total oxidant and antioxidant was significantly increased in children with IDA, and ferrous sulphate was highly effective in correcting elevated oxidative status.”</i> |
| <b>Results that you calculated using a formula</b>                                                                                                                                                                                     | -                                                                                                                                                                                 |
| <b>References to other relevant studies</b><br><i>(Did this report include any references to unpublished data from potentially eligible trials not already identified for this review? If yes, give list contact name and details)</i> | -                                                                                                                                                                                 |
| <b>Correspondence required for further study information</b> <i>(from whom, what and when)</i>                                                                                                                                         | -                                                                                                                                                                                 |

### Sources:

Higgins JPT, Green S (editors). Cochrane Handbook for Systematic Reviews of Interventions Version 5.1.0 [updated March 2011]. The Cochrane Collaboration, 2011. Available from [www.cochrane-handbook.org](http://www.cochrane-handbook.org).
