# Supplementary material for: Effectiveness of iron polymaltose complex in treatment and prevention of iron deficiency anemia in children: a systematic review and meta-analysis
Source: PubMed Central journal article supplement (PMC7811280; doi:10.7717/peerj.10527), 2021-01-13
Supplement: peerj-09-10527-s013.pdf [file peerj-09-10527-s013.pdf]

# Study Eligibility & Data Collection Form

## General Information

|                                                                        |                              |
|------------------------------------------------------------------------|------------------------------|
| <b>Study ID</b><br><i>(e.g. author name, year)</i>                     | Ozsurekci, 2015              |
| <b>Form completed by</b>                                               | Ritzzaleena Rosli Mohd Rosli |
| <b>Study author contact details</b>                                    | ritzz.rosli@student.usm.my   |
| <b>Publication type</b><br><i>(e.g. full report, abstract, letter)</i> | Full report                  |
| <b>List of included publications</b>                                   | -                            |
| <b>References of similar trial*</b>                                    | -                            |

\*This is when the authors published the same study in several reports. All these references to a similar trial should be linked under one *Study ID* in RevMan.

## Study eligibility

|                               | Yes | No | Unclear | Further details |
|-------------------------------|-----|----|---------|-----------------|
| <b>RCT/Quasi/CCT</b>          | /   |    |         | RCT             |
| <b>Relevant participants</b>  | /   |    |         |                 |
| <b>Relevant interventions</b> | /   |    |         |                 |
| <b>Relevant outcomes*</b>     | /   |    |         |                 |

\*Include only if the presence of outcomes forms the inclusion criterion

If the above answers are 'YES', proceed to Section 1.

If any of the above answers are 'NO\*', record below the information for 'Excluded studies'

| Reason(s) for exclusion |
|-------------------------|
| -                       |

## Section 1. Characteristics of included studies

This section is to be completed by only one reviewer. State initials: RRMR

| <b>METHODS</b>                                                            | <b>Descriptions as stated in paper</b>                                                                                                                                                                                 |
|---------------------------------------------------------------------------|------------------------------------------------------------------------------------------------------------------------------------------------------------------------------------------------------------------------|
| <b>Aim of study</b> (e.g. efficacy, equivalence, pragmatic)               | The purpose of this study was to compare the effectiveness of different oral iron preparations in children with iron deficiency anemia (IDA)                                                                           |
| <b>Design</b> (e.g. parallel, crossover, cluster)                         | Parallel study of 3 treatment groups. Group I received ferrous sulfate (Fe-S); Group II received iron polymaltose complexes (Fe-OH-PM), and Group III received a single preparation of combined iron and zinc (Fe-Zn). |
| <b>Unit of allocation</b> (by individuals, cluster/ groups or body parts) | Individuals                                                                                                                                                                                                            |
| <b>Start &amp; end dates</b>                                              | January 2008 till March 2009                                                                                                                                                                                           |
| <b>Total study duration</b>                                               | 1 year 3 months                                                                                                                                                                                                        |
| <b>Sources of funding</b> (including role of funders)                     | -                                                                                                                                                                                                                      |
| <b>Possible conflicts of interest</b> (for study authors)                 | -                                                                                                                                                                                                                      |

| <b>PARTICIPANTS</b>                                                                        | <b>Description</b><br>(include information for each intervention or comparison group)                                                                                                                                                                                                                                                                                                                                                   |
|--------------------------------------------------------------------------------------------|-----------------------------------------------------------------------------------------------------------------------------------------------------------------------------------------------------------------------------------------------------------------------------------------------------------------------------------------------------------------------------------------------------------------------------------------|
| <b>Population description</b> (Company/companies; occupation)                              | Children with iron deficiency anemia                                                                                                                                                                                                                                                                                                                                                                                                    |
| <b>Setting</b> (including location (city, state, country) and single center / multicenter) | Pediatric outpatient clinic in Hecettepe University Faculty of Medicine, Pediatric Hematology Unit.                                                                                                                                                                                                                                                                                                                                     |
| <b>Inclusion criteria</b>                                                                  | <ol style="list-style-type: none"> <li>1. Anemia was defined as hemoglobin (Hgb) below -2SD according to age and gender.</li> <li>2. Iron deficiency (ID) was defined with serum iron, iron-binding capacity, ferritin, and transferrin saturation levels below the range for age and gender appropriate.</li> </ol>                                                                                                                    |
| <b>Exclusion criteria</b>                                                                  | <ol style="list-style-type: none"> <li>1. Anemia due to other causes except IDA; Severe concurrent illness (cardiovascular, renal, hepatic)</li> <li>2. Known hypersensitivity to ferrous or ferric preparations</li> <li>3. Malignancy of any types</li> <li>4. Children with thalassemia major</li> <li>5. Sickle cell anemia or other haemoglobinopathies</li> <li>6. Hemolytic anemia or aplastic or hypoplastic anemia.</li> </ol> |

|                                                                                                      |                                                                    |
|------------------------------------------------------------------------------------------------------|--------------------------------------------------------------------|
| <b>Method of recruitment of participants</b> (e.g. phone, mail, clinic patients, voluntary)          | consecutive patients who attended the pediatric outpatient clinic. |
| <b>Total no. randomized</b>                                                                          | 60                                                                 |
| <b>Clusters</b> (if applicable, no., type, no. people per cluster)                                   | No                                                                 |
| <b>No. randomized per group</b> (specify whether no. people or clusters)                             | Intervention: 21<br>Control: 19<br>(group III: 20)                 |
| <b>No. missing</b> (if overall, e.g. exclusions & withdrawals, whether or not missing from analysis) | 15 dropped out during course of the study.                         |
| <b>Reasons missing</b>                                                                               | Discontinuation of follow up                                       |
| <b>Baseline imbalances</b>                                                                           | No                                                                 |
| <b>Age</b>                                                                                           | 6 months to 15 years                                               |
| <b>Sex (proportion)</b>                                                                              | 35 boys 25 girls                                                   |
| <b>Race/Ethnicity</b>                                                                                | -                                                                  |
| <b>Other relevant sociodemographic</b>                                                               | -                                                                  |
| <b>Subgroups measured</b> (e.g. split by age or sex)                                                 | -                                                                  |
| <b>Subgroups reported</b>                                                                            | -                                                                  |

## Section 2. Risk of bias assessment

We recommend you refer to and use the method described in the Cochrane Handbook.

This section is completed by two reviewers. State initials: (i)RRMR (ii) NMN

| Domain                                                              | Risk of bias           | Support for judgement<br>(include direct quotes where available with explanatory comments)                                                                    | Location in text or source<br>(page, table) |
|---------------------------------------------------------------------|------------------------|---------------------------------------------------------------------------------------------------------------------------------------------------------------|---------------------------------------------|
|                                                                     | Low<br>High<br>Unclear |                                                                                                                                                               |                                             |
| <b>Random sequence generation</b><br>(selection bias)               | high                   | were randomly included in Fe-S (group I), Fe-OH (group II ), and Ferro Zinc(group III) in a consecutive fashion.                                              | Page2                                       |
| <b>Allocation concealment</b><br>(selection bias)                   | unclear                | Not mentioned in full text                                                                                                                                    | -                                           |
| <b>Blinding of participants and personnel</b><br>(performance bias) | unclear                | Not mentioned in full text                                                                                                                                    | -                                           |
| <b>Blinding of outcome assessment</b><br>(detection bias)           | low                    | Comment: Result are unlikely to be affected.<br><br>"Complete blood count (CBC), peripheral blood smear and reticulocyte levels were ordered on the same day" | -                                           |
| <b>Incomplete outcome data</b><br>(attrition bias)                  | low                    | No missing patients after randomization done.                                                                                                                 | -                                           |
| <b>Selective outcome reporting</b><br>(reporting bias)              | low                    | Study protocol not available. However, all pre-specified and expected outcomes of interest are reported                                                       | -                                           |
| <b>Other bias</b>                                                   | low                    | No other bias detected                                                                                                                                        | -                                           |

Random sequence generation = Process used to assign people into intervention and control groups

Allocation concealment = Process used to prevent foreknowledge of group assignment in a RCT

Blinding of participants and personnel = Presence or absence of blinding for participants and health personnel

Blinding of outcome assessment = presence or absence of blinding for assessment of outcome

Incomplete outcome data = application of intention-to-treat analysis is one in which all the participants in a trial are analyzed according to the intervention to which they were allocated

Selective outcome reporting = Selection of a subset of the original variables recorded

### Section 3. Intervention groups

This section is completed by two reviewers. State initials: (i) RRMR (ii) NMN

| Outcomes relevant to your review<br>(Copy and paste from 'Types of outcome measures') | Reported in paper<br>(Yes / No) | Outcome definition<br>(with diagnostic criteria if relevant) | Unit of measurement & tool<br>(if relevant) | Reanalysis required?<br>(specify) |
|---------------------------------------------------------------------------------------|---------------------------------|--------------------------------------------------------------|---------------------------------------------|-----------------------------------|
| 1. Hemoglobin (Hb)                                                                    | Yes                             | Mean level at end of treatment                               | (g/dL)                                      | No                                |
| 2. Serum Ferritin                                                                     | No                              | -                                                            | -                                           | No                                |
| 3. Serum iron                                                                         | No                              | -                                                            | -                                           | No                                |
| 4. Serum mean corpuscular volume (MCV)                                                | No                              | -                                                            | -                                           | No                                |
| 5. Serum mean corpuscular hemoglobin (MCH)                                            | No                              | -                                                            | -                                           | No                                |
| 6. Gastrointestinal disturbances as side effects                                      | No                              | -                                                            | -                                           | No                                |

### Section 4. Data and analysis

| DICHOTOMOUS OUTCOME | Intervention group |                        | Control group    |                        |
|---------------------|--------------------|------------------------|------------------|------------------------|
|                     | Number of events   | Number of participants | Number of events | Number of participants |
| 1.                  | -                  | -                      | -                | -                      |

State details if outcomes were only described in text or figures.

| CONTINUOUS OUTCOME | Unit of measurement | Intervention group |            | Control group |           |
|--------------------|---------------------|--------------------|------------|---------------|-----------|
|                    |                     | n                  | Mean (SD)  | n             | Mean (SD) |
| 1. Hemoglobin (Hb) | (g/dL)              | 19                 | 11.2 (0.5) | 21            | 11.6(0.8) |

State details if outcomes were only described in text or figures.

## Section 5. Other information

|                                                                                                                                                                                                                                        | Description as stated in paper                                                                                                                                                                                                                                                                                                                   |
|----------------------------------------------------------------------------------------------------------------------------------------------------------------------------------------------------------------------------------------|--------------------------------------------------------------------------------------------------------------------------------------------------------------------------------------------------------------------------------------------------------------------------------------------------------------------------------------------------|
| <b>Key conclusions of study authors</b>                                                                                                                                                                                                | <p><i>“each of the three iron preparations have been found to be effective in correcting IDA. There is no difference between the groups”</i></p> <p><i>“in all three groups, no severe side effects were observed”</i></p> <p><i>“both Fe-OH-PM and Fe-Zn preparations like Fe-S may be a choice in the treatment of children with IDA.”</i></p> |
| <b>Results that you calculated using a formula</b>                                                                                                                                                                                     | -                                                                                                                                                                                                                                                                                                                                                |
| <b>References to other relevant studies</b><br><i>(Did this report include any references to unpublished data from potentially eligible trials not already identified for this review? If yes, give list contact name and details)</i> | -                                                                                                                                                                                                                                                                                                                                                |
| <b>Correspondence required for further study information</b> <i>(from whom, what and when)</i>                                                                                                                                         | -                                                                                                                                                                                                                                                                                                                                                |

### Sources:

Higgins JPT, Green S (editors). Cochrane Handbook for Systematic Reviews of Interventions Version 5.1.0 [updated March 2011]. The Cochrane Collaboration, 2011. Available from [www.cochrane-handbook.org](http://www.cochrane-handbook.org).
